# Supplementary material for: On the Thermomechanical Behavior of 3D-Printed Specimens of Shape Memory R-PETG
Source: MDPI journal article supplement (doi:10.3390/polym15102378), 2023-05-19
Supplement: s1 [file s1]

## Supplementary Materials

# On the Thermomechanical Behavior of 3D-Printed Specimens of Shape Memory R-PETG

Ștefan-Dumitru Sava, Nicoleta-Monica Lohan, Bogdan Pricop, Mihai Popa, Nicanor Cimpoeșu, Radu-Ioachim Comănesci and Leandru-Gheorghe Bujoreanu \*

Faculty of Materials Science, “Gheorghe Asachi” Technical University of Iași, Blvd. Dimitrie Mangeron 71A, 700050 Iași, Romania; stefan-dumitru.sava@student.tuiasi.ro (Ș.-D.S.); nicoleta-monica.lohan@academic.tuiasi.ro (N.-M.L.); bogdan.pricop@academic.tuiasi.ro (B.P.); mihai.popa@academic.tuiasi.ro (M.P.); nicanor.cimpoesu@academic.tuiasi.ro (N.C.); radu-ioachim.comaneci@academic.tuiasi.ro (R.-I.C.)

\* Correspondence: leandru-gheorghe.bujoreanu@academic.tuiasi.ro; Tel.: +40-727-486-406

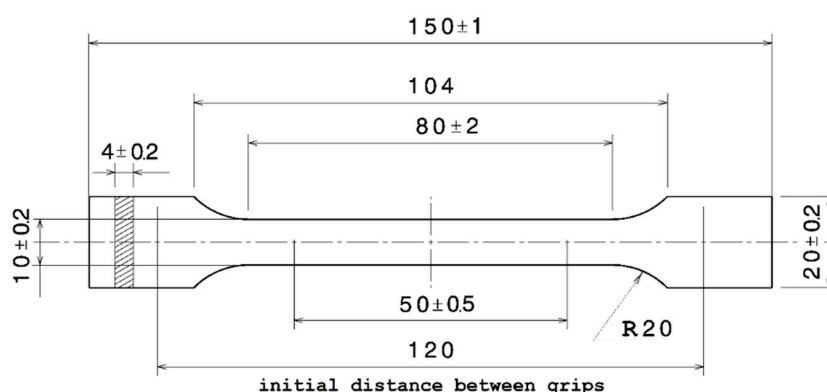

Specimen geometry according to EN ISO 527-2

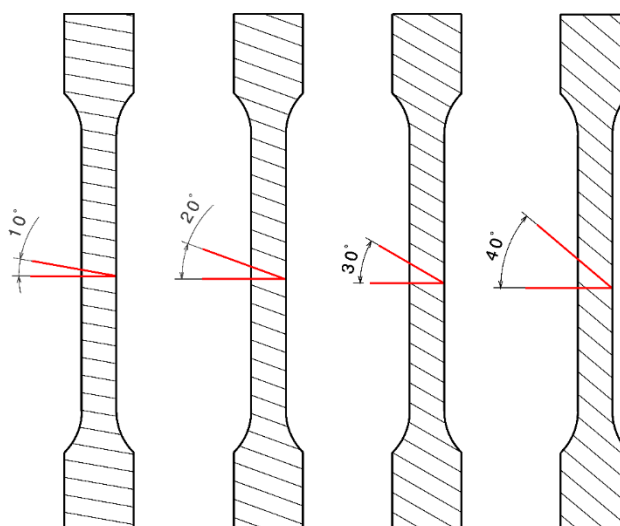

Illustration of the printing angle between transversal direction and filament deposition direction

**Figure S1.** 3D printed specimen geometry and deposition angle.

**Table S1.** Summary of the values of the printing parameters and printers specifications.

|                         | Build Surface        | Extruder temperature                      | Bed temperature          | Nozzle height                               | Printing speed                         | Travel speed | Cooling                                        |
|-------------------------|----------------------|-------------------------------------------|--------------------------|---------------------------------------------|----------------------------------------|--------------|------------------------------------------------|
| Printing parameters     | PEI (Polyetherimide) | 205-220 °C                                | 60-70 °C                 | 0.1-0.2mm                                   | 20-80mm/s                              | 120mm/s      | moderate                                       |
|                         | Style                | Frame                                     | Build volume, mm         | Extruder configuration                      | Extruder                               | Accuracy     | Speed                                          |
| Printers specifications | CoreXY Cartesian     | Aluminum extrusions with 3D printed parts | 210 x 130 x 140          | Direct                                      | Bondtech BMG extruder (3:1 gear ratio) | 0.2-0.4mm    | 20-130mm/s                                     |
|                         | Bed leveling         | Stepper motors                            | Voltage                  | Mainboard                                   | Bed surface                            | Firmware     | Computer                                       |
|                         | manual leveling      | NEMA 17                                   | 24 V (with Meanwell PSU) | SKR V1.4 with TMC2209 stepper motor drivers | PEI sheet                              | Klipper      | Raspberry Pi 4 (to work with Klipper firmware) |
